# Supplementary material
Source: ML conference proceedings conference paper supplement (https://openreview.net/forum?id=0NEjIZlEhP)
Supplement: supplementary_material [file attachment]

The original, pruned, and quantized networks for the MNIST and CIFAR datasets are obtained from Ugare’s work, which can be found at <https://github.com/uiuc-arc/FANC/tree/main/proof_transfer/nets>.
